# Supplementary material
Source: Springer Nature journal article supplement (https://www.springermedizin.de/resource/supplementary/12911_2008_253_MOESM8_ESM.pdf/9527470)
Supplement: MOESM8 [file 9527470]

**4534** citations identified

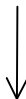

*removed*

**4202:** Citation judged irrelevant

**332** Abstracts evaluated

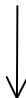

*removed*

**222:** Abstract judged irrelevant

**110** studies warrant full-text evaluation

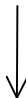

*removed*

**41** Studies Included in Final Sample

**36:** Dosing CDSS only  
**18:** Other form of CDSS  
**7:** Not RCTs  
**3:** Not drug-related  
**3:** Extension studies or interim analysis  
**1:** System was not electronic  
**1:** Foreign language
